# Supplementary material
Source: Springer Nature journal article supplement (https://www.springermedizin.de/resource/supplementary/12885_2009_1978_MOESM4_ESM.pdf/9460228)

| <u>i.p.</u> | <u>s.c.</u> |
|-------------|-------------|
| LL/2 + S180 | ---         |

|      |      |
|------|------|
| LL/2 | S180 |
|------|------|

|      |     |
|------|-----|
| LL/2 | --- |
|------|-----|

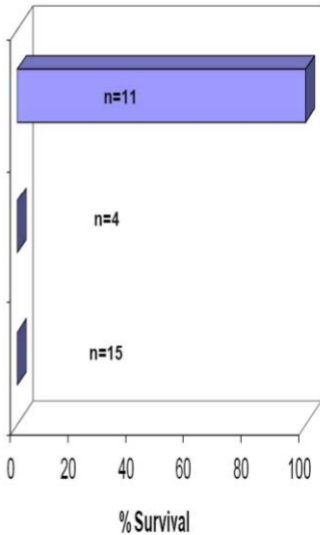

Supplement: MOESM4 [file 9460228]
